# Supplementary material
Source: PubMed Central journal article supplement (PMC3990682)
Supplement: embj0033-0046-sd1.pdf [file embj0033-0046-sd1.pdf]

Figure S1

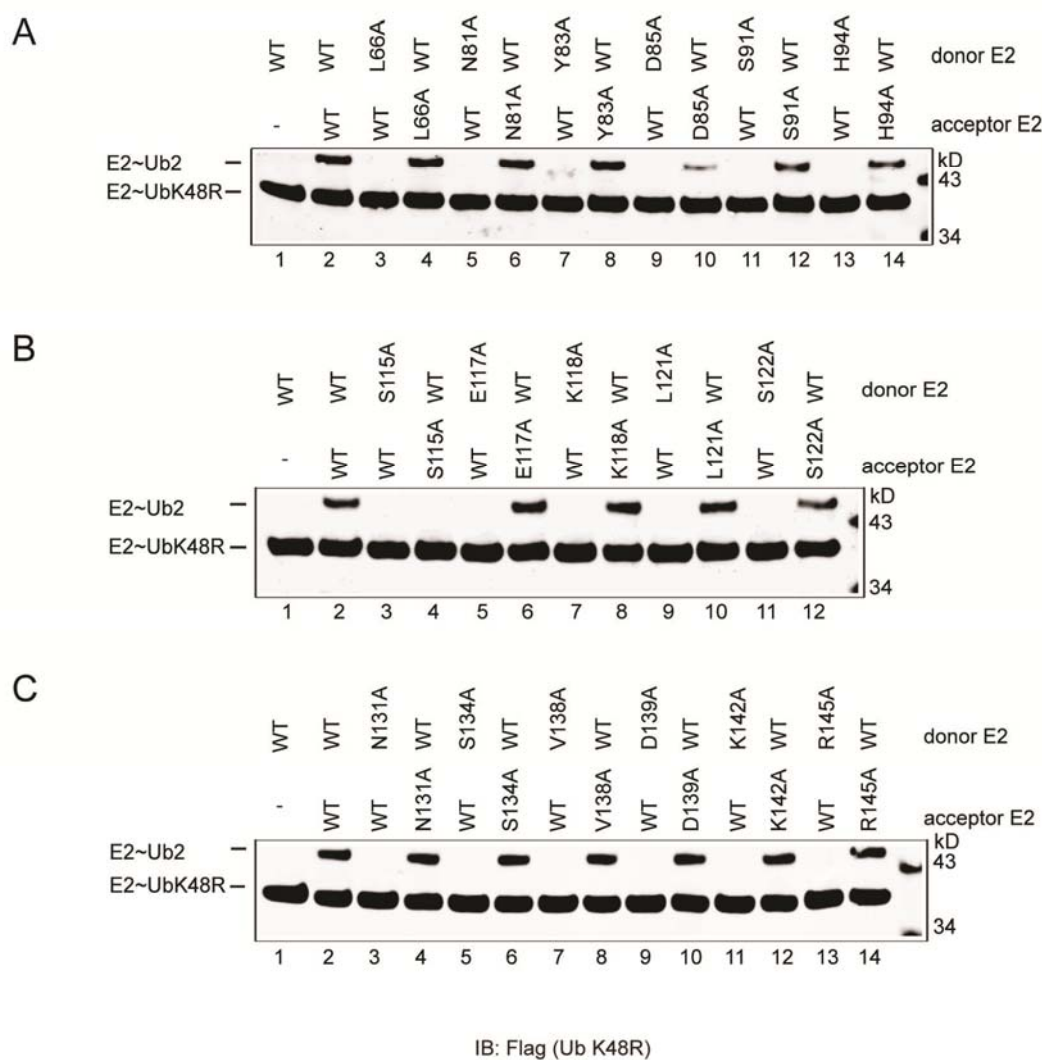

**Figure S1. Alanine scanning results of Ube2g2 surface residues.**

(A-C) Ube2g2 mutants were tested in the single round ubiquitin turnover assay, and the reactions were analyzed by immunoblotting with anti-FLAG antibodies.
