# Supplementary material
Source: PubMed Central journal article supplement (PMC3990682)
Supplement: embj0033-0046-sd2.pdf [file embj0033-0046-sd2.pdf]

Figure S2

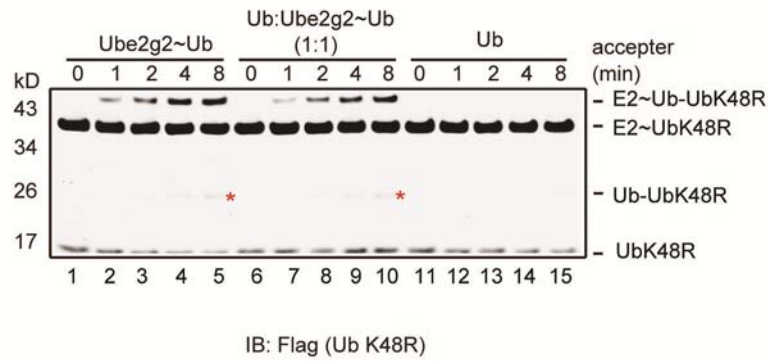

**Figure S2. Ube2g2 preferentially transfers ubiquitin to an Ube2g2~Ub moiety rather than free ubiquitin.**

The same molar concentration of Ube2g2~Ub, ubiquitin, or a mixture of Ube2g2~Ub and Ub (ratio=1:1) were used as the acceptor in the single round ubiquitin turnover assay. The samples were analyzed by SDS-PAGE and immunoblotting with Anti-FLAG antibodies under a non-reducing condition. Asterisks show weak bands of free Ub-UbK48 dimer reduced from E2.
