# Supplementary material
Source: PubMed Central journal article supplement (PMC3990682)
Supplement: embj0033-0046-sd3.pdf [file embj0033-0046-sd3.pdf]

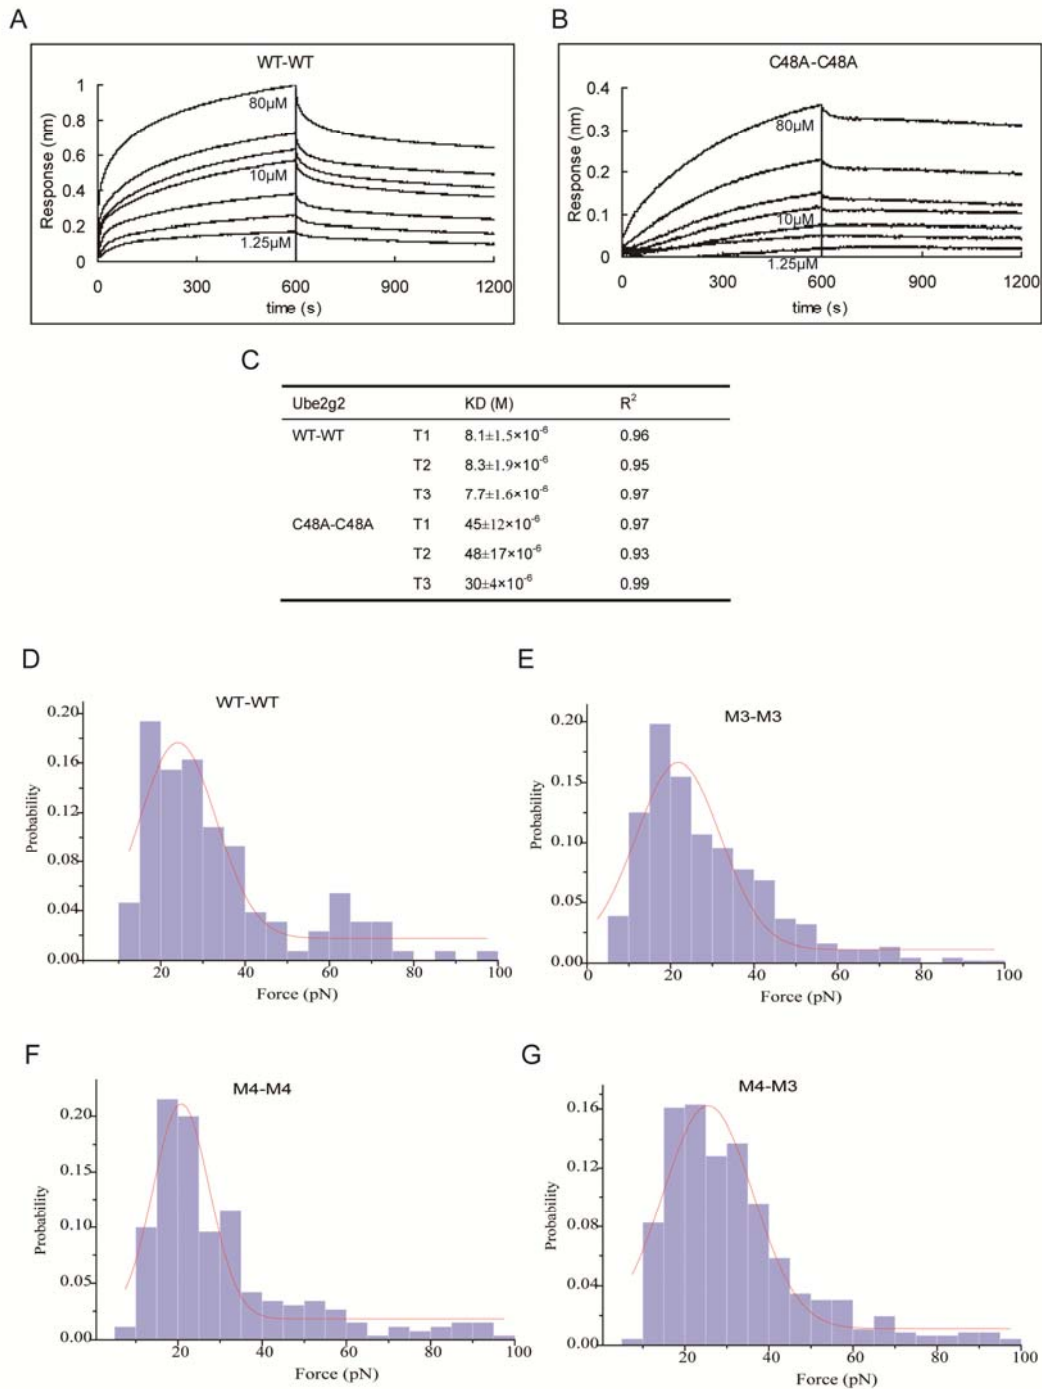

**Figure S3. Interactions between wild type Ube2g2 and its variants.**

(A-C) Bi-layer interferometry analyses were used to monitor protein-protein interaction kinetics. (A, B) Shown are the representative binding curves with Ube2g2 ranging from 1.25 to 80  $\mu$ M. (C) KD of E2 self-association for WT and the C48A mutant measured from three independent experiments. R<sup>2</sup> is the coefficient to evaluate the curve fitting reported by ForteBio Data Analysis software version 7.0. (D-G) The distributions of rupture forces between molecules of WT, M3 and M4 mutants were measured by AFM. (D) WT-WT, (E) M3-M3, (F) M4-M4, (G) M4-M3.
