# Supplementary material
Source: PubMed Central journal article supplement (PMC3990682)
Supplement: embj0033-0046-sd5.pdf [file embj0033-0046-sd5.pdf]

Figure S5

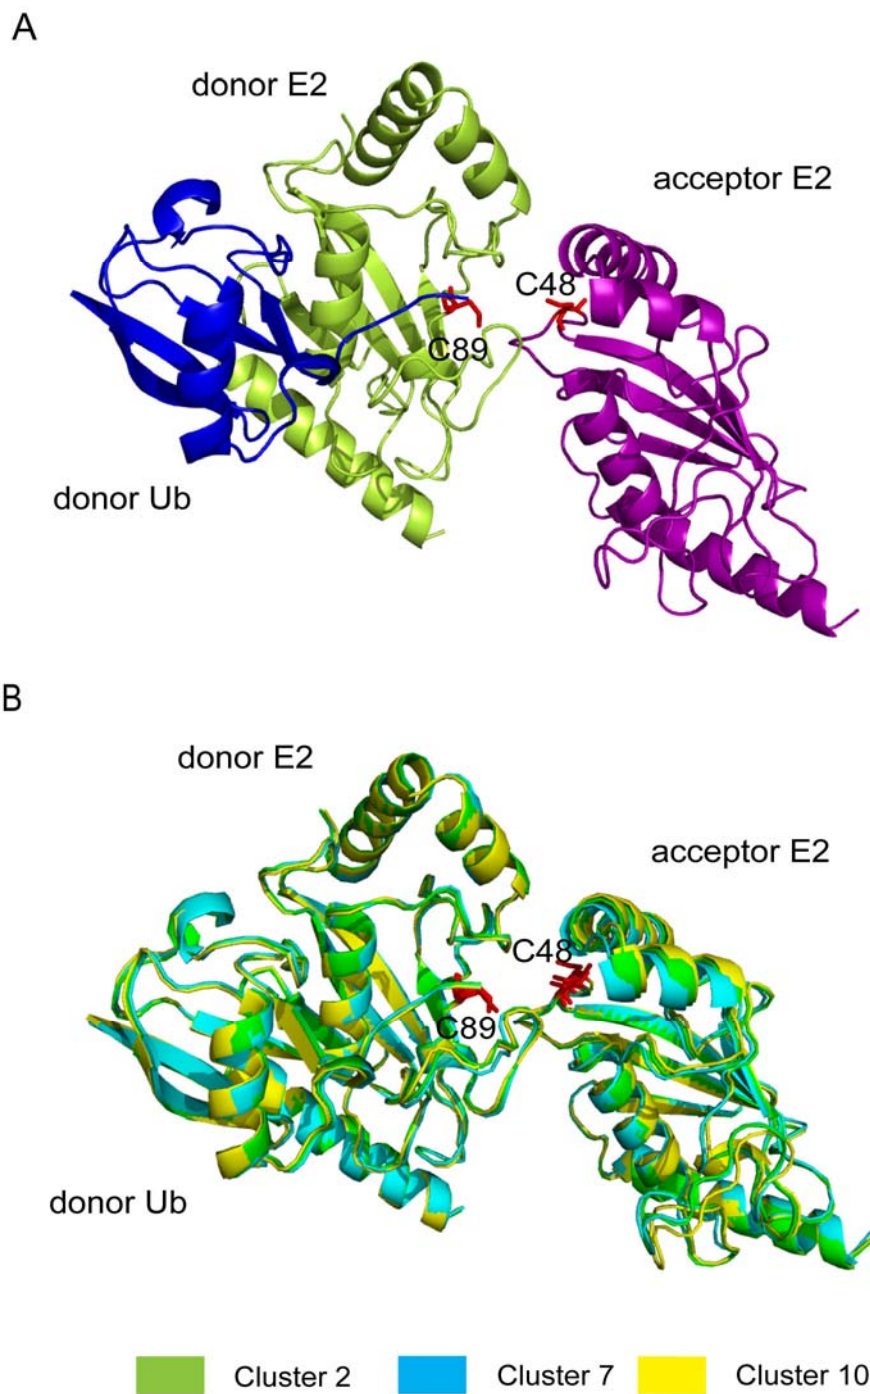

**Figure S5. Modeling the Ube2g2~Ub dimer complex.**

(A) Cluster 2 of the modeled Ube2g2~Ub-Ube2g2 subcomplex. Side chains from Cys89 of the donor Ube2g2 and Cys48 of the acceptor E2 are shown as stick and colored in red.

(B) Models from Cluster 2, 7 and 10 are overlaid, which show similar structures.
