# Supplementary material
Source: PubMed Central journal article supplement (PMC3990682)
Supplement: embj0033-0046-sd6.pdf [file embj0033-0046-sd6.pdf]

Figure S6

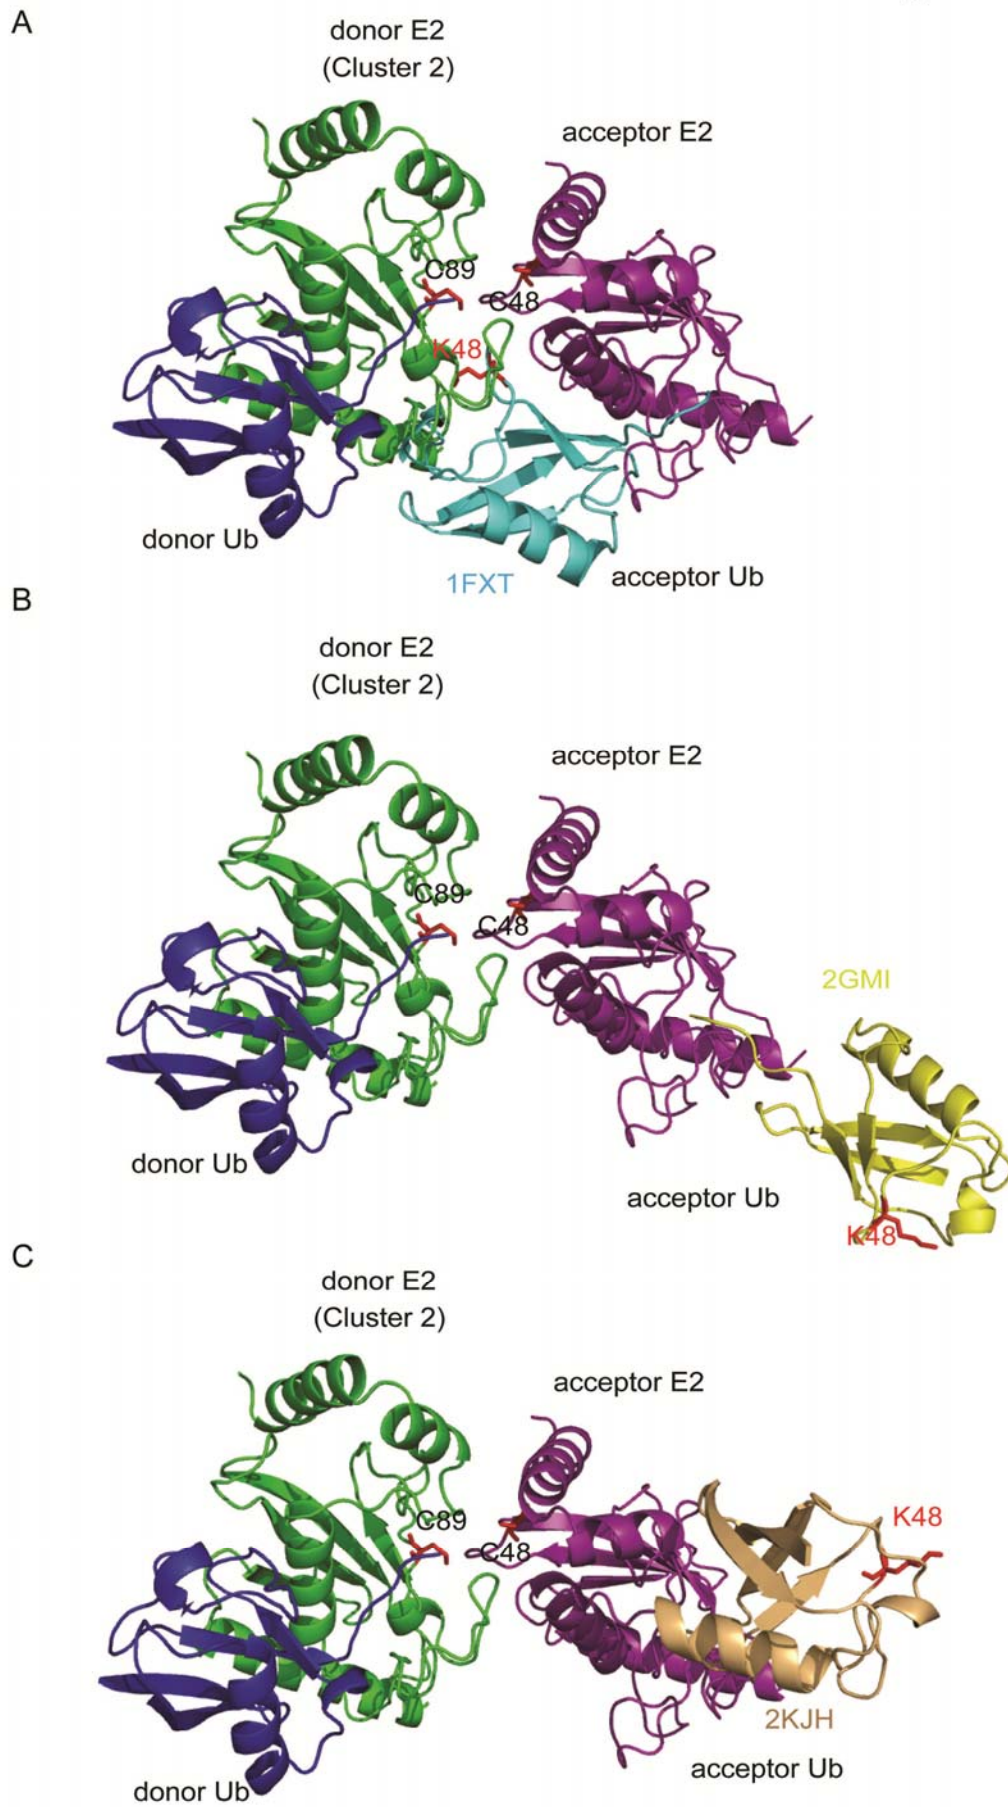

Figure S6

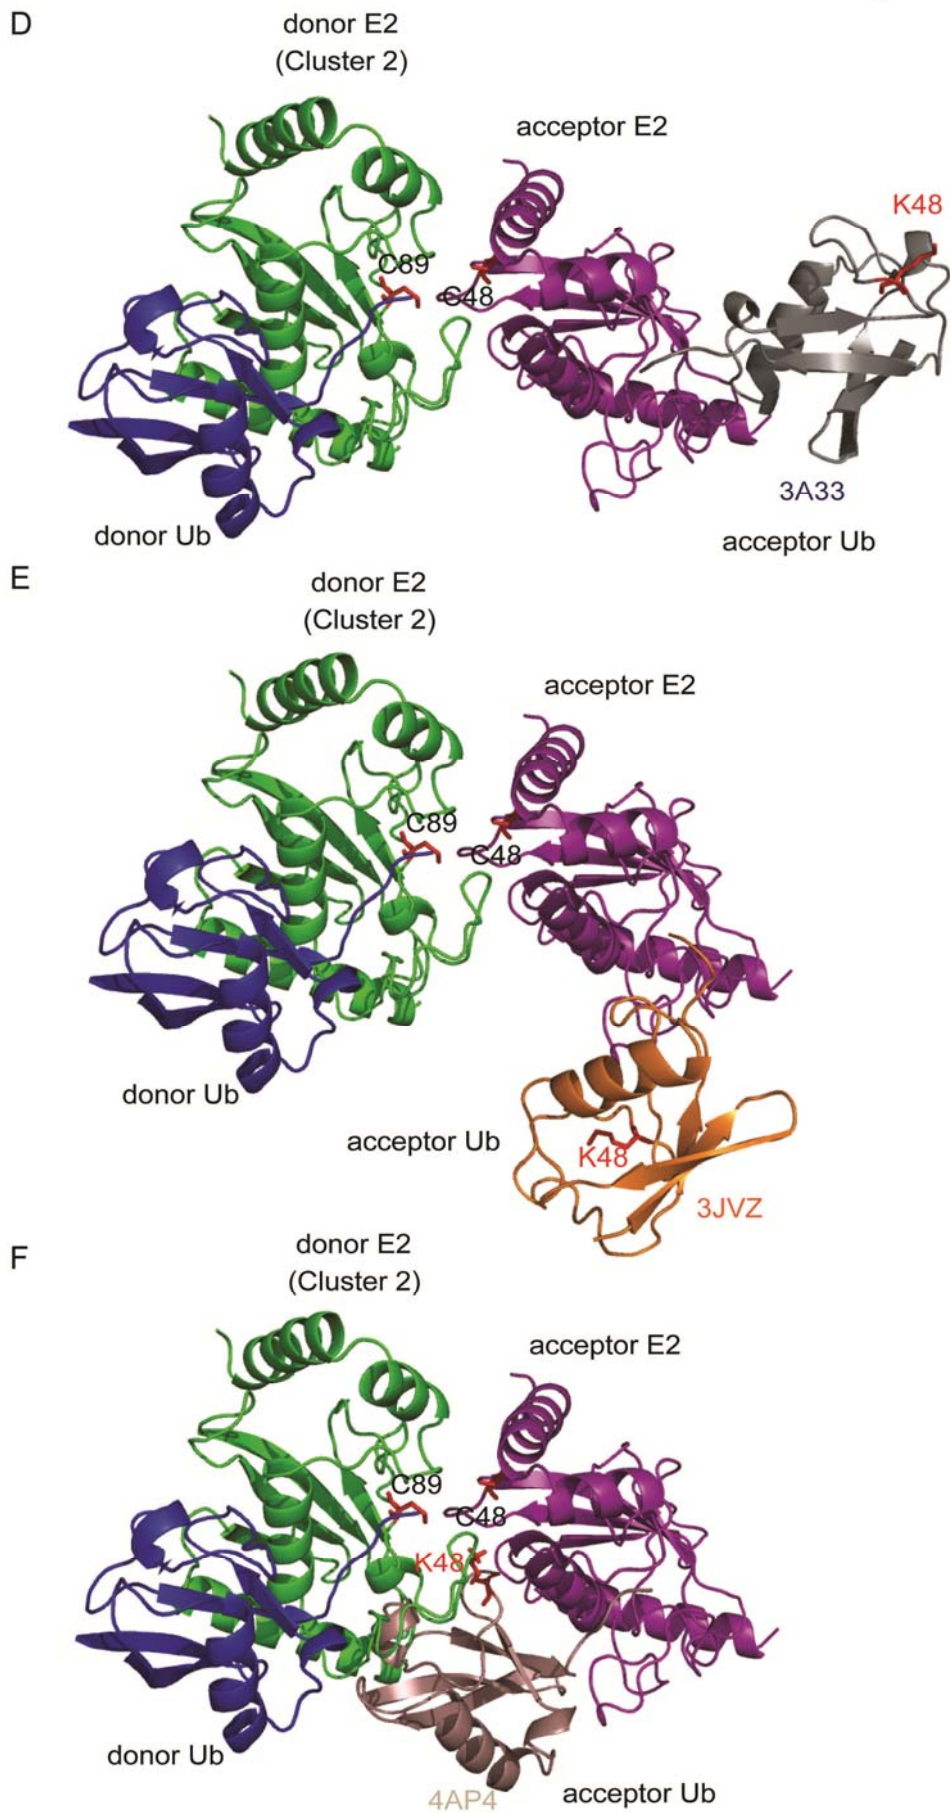

**Figure S6 The acceptor ubiquitin can take various orientations.**

(A-F) PDB structures of the E2~Ubi complexes (4AP4, 1FXT, 2KJH, 2GMI, 3A33 and 3JVZ) were each superimposed on the Ube2g2~Ub-Ube2g2 subcomplex model in cluster 2 by overlaying the E2 structures onto the acceptor Ube2g2. Six different acceptor ubiquitin orientations were generated (A-F). Note that Lys48 in acceptor ubiquitins are colored in red.

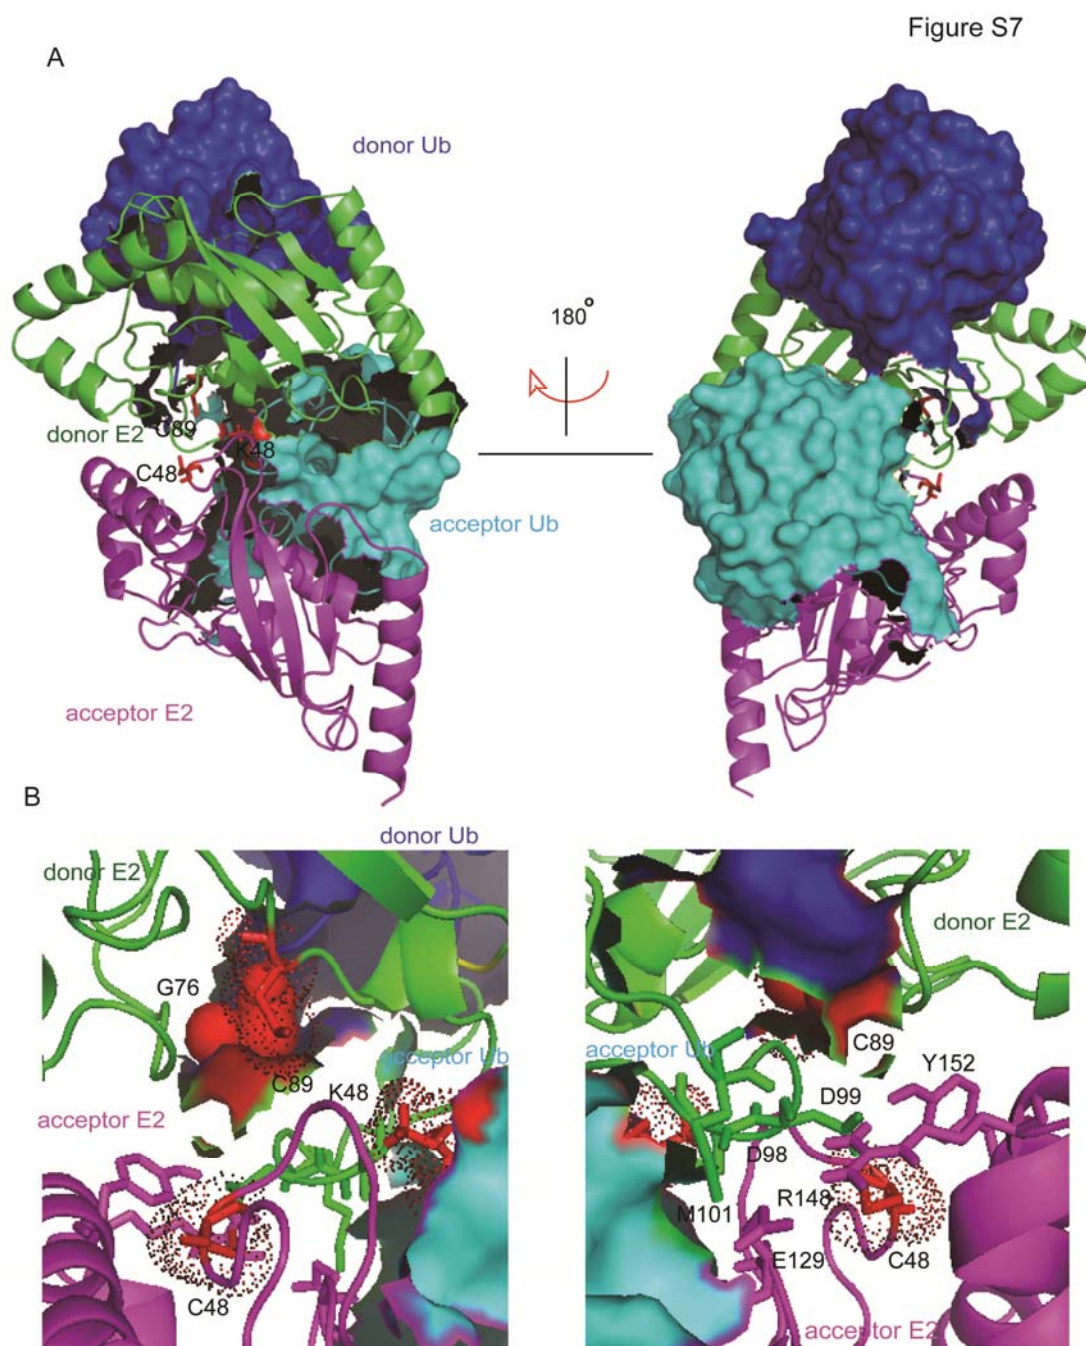

**Figure S7 Characterization of the Ube2g2 dimer interface**
