# Supplementary material
Source: PubMed Central journal article supplement (PMC3990682)
Supplement: embj0033-0046-sd11.pdf [file embj0033-0046-sd11.pdf]

**Table S1. Ube2g2 Surface plot. The indicated residues are substituted with Alanine, and their phenotypes were shown as donor or acceptor in Ub transfer.**

| Residue ID | Residue name | residue | Main chain | Side chain | Donor | Acceptor |
|------------|--------------|---------|------------|------------|-------|----------|
| 1          | MET          | 12.4728 | 0.6138     | 24.3317    | 63%   | 100%     |
| 4          | THR          | 8.5083  | 0.7721     | 18.8233    | 65%   | 65%      |
| 6          | LEU          | 6.6487  | 0.0000     | 13.2975    | 65%   | 80%      |
| 7          | LYS          | 16.4108 | 1.2085     | 28.5726    | 80%   | 80%      |
| 10         | MET          | 10.3603 | 0.9218     | 19.7988    | 75%   | 93%      |
| 14         | LYS          | 13.4109 | 0.8751     | 23.4395    | 97%   | 97%      |
| 15         | GLN          | 9.8144  | 0.0000     | 17.6659    | 96%   | 98%      |
| 17         | THR          | 9.9062  | 6.8016     | 14.0456    | 96%   | 100%     |
| 18         | LEU          | 13.9217 | 6.3437     | 21.4997    | 100%  | 100%     |
| 19         | ASN          | 11.7673 | 1.8172     | 21.7173    | 97%   | 100%     |
| 20         | PRO          | 13.7280 | 6.0310     | 23.9906    | 78%   | 91%      |
| 22         | GLU          | 18.0288 | 3.0348     | 30.0239    | 71%   | 75.5%    |
| 25         | VAL          | 10.138  | 1.3983     | 21.7911    | 50%   | 90%      |
| 29         | MET          | 10.5027 | 8.0315     | 12.9739    | 82%   | 97%      |
| 30         | ASN          | 7.7358  | 1.6787     | 13.7928    | 77%   | 100%     |
| 31         | GLU          | 15.0789 | 3.7810     | 24.1172    | 71%   | 93%      |
| 32         | GLU          | 15.8253 | 9.6673     | 20.7518    | 100%  | 100%     |
| 33         | ASN          | 7.6037  | 0.7836     | 14.4237    | 40%   | 60%      |
| 36         | GLU          | 6.3676  | 0.0066     | 11.4564    | 59%   | 77%      |
| 38         | GLU          | 9.8100  | 0.9117     | 16.9286    | 46%   | 100%     |
| 40         | LEU          | 6.1963  | 0.0000     | 12.3927    | 59%   | 100%     |
| 45         | GLU          | 15.6422 | 1.3261     | 27.0951    | 80%   | 96%      |
| 46         | ASP          | 17.9081 | 9.7488     | 26.0674    | 85%   | 95%      |
| 48         | CYS          | 2.4764  | 2.7476     | 1.9339     | 65%   | 0%       |
| 50         | GLU          | 5.0434  | 1.0585     | 8.2313     | 95%   | 100%     |
| 51         | PHE          | 14.4933 | 4.5361     | 20.1832    | 100%  | 100%     |
| 53         | VAL          | 7.4934  | 0.3695     | 16.9920    | 64%   | 90%      |
| 59         | SER          | 5.9672  | 0.8676     | 16.1665    | 78%   | 93%      |
| 62         | LEU          | 15.5581 | 1.1298     | 29.9865    | 100%  | 93%      |
| 66         | LEU          | 13.0181 | 4.8054     | 21.2307    | 0%    | 94%      |
| 67         | SER          | 5.4040  | 0.1012     | 16.0096    | 65%   | 75%      |
| 70         | LYS          | 13.6319 | 0.8460     | 23.8606    | 83%   | 100%     |
| 72         | ARG          | 8.6006  | 0.0000     | 13.5152    | 61%   | 75%      |
| 74         | THR          | 11.4828 | 8.4105     | 15.5790    | 67%   | 77%      |
| 75         | CYS          | 5.6015  | 5.0682     | 6.6681     | 76%   | 59%      |
| 76         | GLU          | 10.6153 | 4.2541     | 15.7043    | 71%   | 61%      |
| 81         | ASN          | 0.8269  | 0.0000     | 1.6538     | 0%    | 92%      |
| 83         | TYR          | 7.6841  | 1.3471     | 10.8526    | 0%    | 94%      |
| 84         | PRO          | 17.9673 | 11.6024    | 26.4538    | 68%   | 70%      |

|                   |                     |                    |                  |                    |      |      |
|-------------------|---------------------|--------------------|------------------|--------------------|------|------|
| 85                | ASP                 | 10.2882            | 3.8685           | 16.7078            | 0%   | 47%  |
| 87                | ARG                 | 7.2183             | 0.0001           | 11.3430            | 94%  | 87%  |
| 91                | SER                 | 8.1385             | 1.9748           | 20.4660            | 0%   | 80%  |
| 94                | HIS                 | 5.7924             | 0.0538           | 9.6181             | 0%   | 83%  |
| 96                | PRO                 | 11.5563            | 5.3132           | 19.8805            | 45%  | 100% |
| 97                | GLY                 | 12.8797            | 12.8797          | 0.0000             | 0%   | 60%  |
| 98/99/<br>104/108 | ASP/ASP/<br>GLU/GLU | 11.9102<br>12.7615 | 1.9860<br>2.6498 | 21.8344<br>20.8509 | 0%   | 25%  |
| 100               | PRO                 | 16.001             | 4.0498           | 31.9359            | 40%  | 100% |
| 101               | MET                 | 23.8911            | 9.3826           | 38.3995            | 40%  | 100% |
| 102               | GLY                 | 9.2395             | 9.2395           | 0                  | 60%  | 100% |
| 103               | TYR                 | 15.9691            | 1.8275           | 23.0399            | 0%   | 78%  |
| 105               | SER                 | 3.2078             | 1.0853           | 7.4529             | 40%  | 40%  |
| 106               | SER                 | 17.4492            | 11.259           | 29.8297            | 100% | 100% |
| 111               | SER                 | 5.6596             | 0.4863           | 16.0061            | 50%  | 100% |
| 112               | PRO                 | 9.7874             | 2.3468           | 19.7081            | 68%  | 78%  |
| 115               | SER                 | 3.2144             | 0.0005           | 9.6422             | 0%   | 16%  |
| 117               | GLU                 | 6.4270             | 0.1331           | 11.4621            | 0%   | 100% |
| 118               | LYS                 | 10.1417            | 1.0044           | 17.4516            | 0%   | 100% |
| 121               | LEU                 | 10.5887            | 0.5161           | 20.6613            | 0%   | 98%  |
| 122               | SER                 | 6.5721             | 1.8279           | 16.0605            | 0%   | 80%  |
| 125               | SER                 | 10.1553            | 1.1233           | 28.2193            | 93%  | 100% |
| 131               | ASN                 | 8.0487             | 1.3109           | 14.7865            | 0%   | 100% |
| 134               | SER                 | 3.3683             | 2.8234           | 4.4581             | 0%   | 100% |
| 138               | VAL                 | 13.3751            | 0.8544           | 30.0695            | 0%   | 100% |
| 139               | ASP                 | 12.7040            | 0.8488           | 24.5593            | 0%   | 100% |
| 142               | LYS                 | 11.4502            | 0.4151           | 20.2783            | 0%   | 100% |
| 145               | ARG                 | 11.6227            | 5.8514           | 14.9206            | 0%   | 100% |
| 146               | ASP                 | 10.5189            | 8.3880           | 12.6498            | 54%  | 74%  |
| 147               | ASP                 | 8.3641             | 1.7153           | 15.0129            | 100% | 78%  |
| 148               | ARG                 | 7.9646             | 0.5627           | 12.1943            | 61%  | 78%  |
| 149               | GLU                 | 12.8595            | 0.7846           | 22.5193            | 53%  | 83%  |
| 150               | GLN                 | 7.5250             | 0.3682           | 13.2504            | 69%  | 90%  |
| 152               | TYR                 | 5.5125             | 0.0000           | 8.2688             | 60%  | 77%  |
| 153               | LYS                 | 14.5707            | 1.6230           | 24.9289            | 100% | 100% |
| 154               | ILE                 | 4.8688             | 0.0000           | 9.7377             | 100% | 100% |
| 156               | LYS                 | 12.4607            | 0.1165           | 22.3361            | 79%  | 100% |
| 157               | GLN                 | 8.9279             | 0.2601           | 15.8622            | 100% | 100% |
| 160               | GLN                 | 9.4599             | 0.0000           | 17.0278            | 100% | 100% |
| 161               | LYS                 | 11.0239            | 5.2611           | 15.6341            | 96%  | 100% |
| 163/165           | LEU/LEU             | 9.5/17.3           | 7.3/8.1          | 11.7/24.6          | 0    | 95%  |

Ube2g2 mutants affect the acceptor E2 function; Ube2g2 mutants affect the donor E2 function;  
Ube2g2 mutants affect both acceptor and donor E2 function.
