# Supplementary material
Source: PubMed Central journal article supplement (PMC3990682)
Supplement: embj0033-0046-sd12.pdf [file embj0033-0046-sd12.pdf]

**Table S2. HADDOCK output for modeling the E2~Ub-E2 complex.**

|                   | <b>Haddock score</b> | <b># structures</b> | <b>RMSD (Å)</b>   | <b>Evdw (kcal mol<sup>-1</sup>)</b> | <b>Eelec (kcal mol<sup>-1</sup>)</b> | <b>Edesov (kcal mol<sup>-1</sup>)</b> | <b>EAIR (kcal mol<sup>-1</sup>)</b> | <b>buried surface area (Å<sup>2</sup>)</b> |
|-------------------|----------------------|---------------------|-------------------|-------------------------------------|--------------------------------------|---------------------------------------|-------------------------------------|--------------------------------------------|
| <b>Cluster 2</b>  | <b>-123.2 ± 10.1</b> | <b>22</b>           | <b>17.6 ± 1.6</b> | <b>-19.2 ± 3.5</b>                  | <b>-246.6 ± 50.9</b>                 | <b>17.1±5.8</b>                       | <b>9.4 ±8.84</b>                    | <b>1065.9 ±62.3</b>                        |
| Cluster 3         | -122.1 ± 12.7        | 16                  | 8.8 ± 6.4         | -25.8 ± 4.9                         | -252.2 ± 40.3                        | 17.1± 7.0                             | 35.5± 26.41                         | 1079.4± 173.0                              |
| Cluster 1         | -121.7± 23.9         | 22                  | 8.3± 5.3          | -25.3± 3.0                          | -204.6± 68.9                         | 16.7± 3.6                             | 34.2± 1.53                          | 1041.4± 201.6                              |
| Cluster 4         | -118.9± 14.0         | 15                  | 12.8± 3.9         | -22.4± 2.0                          | -223.8± 74.3                         | 12.8± 10.5                            | 19.5± 14.38                         | 962.3± 134.6                               |
| Cluster 5         | -108.1± 8.6          | 14                  | 10.6± 2.3         | -22.2± 6.9                          | -161.3± 35.7                         | 13.0± 6.1                             | 25.6± 11.19                         | 889.8± 48.9                                |
| <b>Cluster 10</b> | <b>-105.2±9.6</b>    | <b>10</b>           | <b>14.2± 3.3</b>  | <b>-19.8± 4.8</b>                   | <b>-183.4± 86.1</b>                  | <b>8.7± 6.9</b>                       | <b>19.2± 15.59</b>                  | <b>902.9± 104.3</b>                        |
| <b>Cluster 7</b>  | <b>-104.9± 11.8</b>  | <b>13</b>           | <b>14.2± 3.1</b>  | <b>-22.8± 0.9</b>                   | <b>-185.8± 80.4</b>                  | <b>12.8± 10.3</b>                     | <b>13.5± 14.62</b>                  | <b>954.1± 177.0</b>                        |
| Cluster 8         | -103.2± 8.0          | 11                  | 12.9± 2.1         | -19.7± 2.1                          | -137.8± 33.4                         | 5.9± 1.6                              | 20.9± 15.03                         | 840.2± 73.3                                |
| Cluster 6         | -98.3± 9.5           | 14                  | 11.9± 2.7         | -18.6± 2.3                          | -165.4± 59.8                         | 10.4± 6.3                             | 18.4± 15.61                         | 793.8± 49.3                                |
| Cluster 12        | -98.0± 11.7          | 7                   | 13.3± 2.3         | -20.5± 1.2                          | -147.0± 43.8                         | 7.3± 2.6                              | 11.8± 11.18                         | 862.7± 83.5                                |
